# Supplementary material for: Measurement properties of the ICECAP-A capability well-being instrument among dermatological patients
Source: Springer Nature journal article supplement (doi:10.1007/s11136-021-02967-2), 2021-08-09
Supplement: MOESM1 [file 19555962]

## Electronic Supplementary Material

Title: Measurement properties of the ICECAP-A capability well-being instrument among dermatological patients

Authors: Fanni Rencz, Ariel Z. Mitev, Balázs Jenei and Valentin Brodszky

Journal: Quality of Life Research

### Supplementary material 1 Other skin conditions reported in the open-ended textbox

| Skin condition*                      | n  | %    |
|--------------------------------------|----|------|
| seborrheic dermatitis                | 10 | 1.6% |
| naevi                                | 7  | 1.1% |
| scalp or hair diseases               | 7  | 1.1% |
| vitiligo                             | 7  | 1.1% |
| xeroderma                            | 6  | 1.0% |
| melanoma                             | 6  | 1.0% |
| other fungal disease**               | 5  | 0.8% |
| polymorphic light eruption           | 5  | 0.8% |
| fibroma                              | 4  | 0.6% |
| herpes                               | 3  | 0.5% |
| leg ulcer                            | 3  | 0.5% |
| milium                               | 3  | 0.5% |
| keratoma                             | 2  | 0.3% |
| keratosis (unspecified)              | 2  | 0.3% |
| lipoma                               | 2  | 0.3% |
| lymphedema                           | 2  | 0.3% |
| acroangiodermatitis                  | 1  | 0.2% |
| actinic keratosis                    | 1  | 0.2% |
| aphthous stomatitis                  | 1  | 0.2% |
| capillary damages                    | 1  | 0.2% |
| clavus                               | 1  | 0.2% |
| demodex mite                         | 1  | 0.2% |
| erysipelas                           | 1  | 0.2% |
| erythroplasia of Queyrat             | 1  | 0.2% |
| folliculitis                         | 1  | 0.2% |
| hidradenitis suppurativa             | 1  | 0.2% |
| human papillomavirus infection       | 1  | 0.2% |
| ichthyosis                           | 1  | 0.2% |
| keloid                               | 1  | 0.2% |
| leukoplakia                          | 1  | 0.2% |
| lichen planus                        | 1  | 0.2% |
| malassezia furfur                    | 1  | 0.2% |
| melasma                              | 1  | 0.2% |
| neurofibromatosis                    | 1  | 0.2% |
| onychocryptosis                      | 1  | 0.2% |
| skin cancer (unspecified)            | 1  | 0.2% |
| skin symptoms of sclerosis multiplex | 1  | 0.2% |
| systemic lupus erythematosus         | 1  | 0.2% |
| striae                               | 1  | 0.2% |
| unknown***                           | 4  | 0.6% |

\*Patients were allowed to report multiple skin conditions.

\*\* Other than onychomycosis and tinea pedis.

\*\*\*Patients that described their skin symptoms, but did not report the name of the condition.
